# Supplementary material for: The roles of body size and phylogeny in fast and slow life histories
Source: Springer Nature journal article supplement (doi:10.1007/s10682-008-9276-y), 2008-08-04
Supplement: 10682_2008_9276_MOESM1_ESM.pdf [file 10682_2008_9276_MOESM1_ESM.pdf]

**Supplement to Jeschke and Kokko, “The roles of body size and phylogeny in fast and slow life histories”: Complete results of principal components analyses**

**Table S1** Principal components analysis of fish raw data ( $N = 46$ ).

|  |  | First axis |
|-----------------------------------------------------------------------------------|--|------------|
| Variance explained                                                                |  | 66%        |
| AFR                                                                               |  | 0.90       |
| Interbirth interval                                                               |  | 0.67       |
| Lifespan                                                                          |  | 0.94       |
| Body mass                                                                         |  | 0.93       |
| Offspring mass                                                                    |  | 0.49       |
| Fecundity                                                                         |  | 0.85       |

Shown are correlation coefficients between each trait and axis. The strongest correlation for each trait is highlighted by a grey background (this is more informative where more than one axis was extracted, see below).

**Table S2** Principal components analysis of fish data, body mass factored out ( $N = 46$ ).

|  | First axis | Second axis |
|-----------------------------------------------------------------------------------|------------|-------------|
| Variance explained                                                                | 43%        | 28%         |
| AFR                                                                               | 0.75       | 0.29        |
| Interbirth interval                                                               | 0.56       | 0.59        |
| Lifespan                                                                          | 0.71       | 0.28        |
| Offspring mass                                                                    | -0.49      | 0.79        |
| Fecundity                                                                         | 0.73       | -0.50       |

**Table S3** Principal components analysis of fish data, phylogeny factored out ( $N = 45$ ).

|  | First axis | Second axis |
|-----------------------------------------------------------------------------------|------------|-------------|
| Variance explained                                                                | 51%        | 21%         |
| AFR                                                                               | 0.89       | 0.01        |
| Interbirth interval                                                               | -0.03      | 0.88        |
| Lifespan                                                                          | 0.88       | 0.11        |
| Body mass                                                                         | 0.90       | 0.03        |
| Offspring mass                                                                    | 0.63       | 0.36        |
| Fecundity                                                                         | -0.54      | 0.62        |

**Table S4** Principal components analysis of fish data, phylogeny and body mass factored out ( $N = 45$ ).

|  | First axis | Second axis |
|-----------------------------------------------------------------------------------|------------|-------------|
| Variance explained                                                                | 32%        | 29%         |
| AFR                                                                               | 0.89       | -0.20       |
| Interbirth interval                                                               | 0.15       | 0.78        |
| Lifespan                                                                          | 0.86       | -0.02       |
| Offspring mass                                                                    | 0.23       | 0.45        |
| Fecundity                                                                         | -0.04      | -0.78       |

**Table S5** Principal components analysis of mammal raw data ( $N = 100$ ).

|                                                                                   | First axis |
|-----------------------------------------------------------------------------------|------------|
|  |            |
| Variance explained                                                                | 78%        |
| AFR                                                                               | 0.90       |
| Interbirth interval                                                               | 0.73       |
| Lifespan                                                                          | 0.87       |
| Body mass                                                                         | 0.96       |
| Offspring mass                                                                    | 0.95       |
| Fecundity                                                                         | -0.86      |

**Table S6** Principal components analysis of mammal data, body mass factored out ( $N = 100$ ).

|  | First axis | Second axis |
|-----------------------------------------------------------------------------------|------------|-------------|
| Variance explained                                                                | 37%        | 29%         |
| AFR                                                                               | -0.35      | 0.77        |
| Interbirth interval                                                               | -0.40      | 0.73        |
| Lifespan                                                                          | -0.44      | 0.10        |
| Offspring mass                                                                    | 0.88       | 0.24        |
| Fecundity                                                                         | -0.78      | -0.50       |

**Table S7** Principal components analysis of mammal data, phylogeny factored out ( $N = 99$ ).

|  | First axis | Second axis | Third axis |
|-----------------------------------------------------------------------------------|------------|-------------|------------|
| Variance explained                                                                | 37%        | 18%         | 17%        |
| AFR                                                                               | 0.82       | -0.12       | 0.24       |
| Interbirth interval                                                               | 0.61       | -0.41       | 0.38       |
| Lifespan                                                                          | 0.65       | 0.26        | 0.08       |
| Body mass                                                                         | 0.78       | -0.06       | -0.34      |
| Offspring mass                                                                    | 0.15       | 0.87        | 0.37       |
| Fecundity                                                                         | -0.37      | -0.24       | 0.75       |

**Table S8** Principal components analysis of mammal data, phylogeny and body mass factored out ( $N = 99$ ).

|  | First axis | Second axis | Third axis |
|-----------------------------------------------------------------------------------|------------|-------------|------------|
| Variance explained                                                                | 32%        | 22%         | 21%        |
| AFR                                                                               | 0.83       | -0.19       | -0.10      |
| Interbirth interval                                                               | 0.73       | -0.46       | -0.19      |
| Lifespan                                                                          | 0.468      | 0.472       | 0.44       |
| Offspring mass                                                                    | 0.39       | 0.74        | -0.06      |
| Fecundity                                                                         | 0.05       | -0.30       | 0.89       |



**Table S9** Principal components analysis of bird raw data ( $N = 302$ ).

|  | First axis | Second axis |
|-----------------------------------------------------------------------------------|------------|-------------|
| Variance explained                                                                | 60%        | 20%         |
| AFR                                                                               | 0.90       | -0.20       |
| Interbirth interval                                                               | 0.52       | 0.59        |
| Lifespan                                                                          | 0.81       | -0.23       |
| Body mass                                                                         | 0.92       | 0.22        |
| Offspring mass                                                                    | 0.93       | 0.20        |
| Fecundity                                                                         | -0.40      | 0.82        |

**Table S10** Principal components analysis of bird data, body mass factored out ( $N = 302$ ).

|  | First axis | Second axis |
|-----------------------------------------------------------------------------------|------------|-------------|
| Variance explained                                                                | 41%        | 24%         |
| AFR                                                                               | 0.84       | -0.18       |
| Interbirth interval                                                               | -0.09      | -0.85       |
| Lifespan                                                                          | 0.66       | 0.32        |
| Offspring mass                                                                    | 0.42       | -0.56       |
| Fecundity                                                                         | -0.85      | -0.12       |

**Table S11** Principal components analysis of bird data, phylogeny factored out ( $N = 301$ ).

|  | First axis | Second axis |
|-----------------------------------------------------------------------------------|------------|-------------|
| Variance explained                                                                | 44%        | 20%         |
| AFR                                                                               | 0.72       | 0.01        |
| Interbirth interval                                                               | 0.08       | -0.88       |
| Lifespan                                                                          | 0.45       | 0.47        |
| Body mass                                                                         | 0.91       | -0.18       |
| Offspring mass                                                                    | 0.93       | -0.15       |
| Fecundity                                                                         | -0.44      | -0.36       |

**Table S12** Principal components analysis of bird data, phylogeny and body mass factored out ( $N = 301$ ).

|  | First axis | Second axis |
|-----------------------------------------------------------------------------------|------------|-------------|
| Variance explained                                                                | 30%        | 23%         |
| AFR                                                                               | 0.62       | -0.36       |
| Interbirth interval                                                               | -0.42      | -0.68       |
| Lifespan                                                                          | 0.39       | 0.65        |
| Offspring mass                                                                    | 0.60       | -0.33       |
| Fecundity                                                                         | -0.66      | 0.18        |
